# Supplementary material for: A 3D-Var Assimilation Scheme for Vertical Velocity with the CMA-MESO v5.0
Source: Copernicus journal article supplement (doi:10.5194/gmd-2023-180), 2023-11-21
Supplement: Supplementary file [file gmd-2023-180-RC2-supplement.pdf]

The article presents a 3DVAR assimilation scheme for  $w$ , which appears reasonable and has a positive impact based on results from a heavy-rain event and a 10-day batch experiment. However, there are some doubts:

1. From the batch experiment results, it was found that  $w$  assimilation has a small impact on the forecast. However, in the case study where  $w$  was assimilated in a cyclical manner, it led to significant improvements in the forecast. It is suggested that the authors also set multiple  $w$  assimilations in the batch experiment section.

2. As mentioned by the author, some studies assimilate  $w$  from total lightning data. In this article, however, the  $w$  observations are derived from radar reflectivity data. It is unclear how the authors obtained at the approximate magnitude of the  $w$  values using this method. In addition, were the authors able to compare the radar reflectivity-derived  $w$  with the  $w$  of the model background field to determine any differences in magnitude between the two values? If there is a significant difference, it may be necessary to remove the larger  $w$  values during the assimilation process.

Some minor revisions are as follows:

Page 1:

Line 21: Change “the result indicates” to “the results indicate”.

Line 22: The statement “leading to improved equitable threat score (frequency skill score) for the first 1 h (3 h) precipitation forecasts” may cause confusion, please describe it in detail.

Line 23: Change “assimilated” to “assimilation”.

Page 2:

Line 36: Change “allows they” to “allows them”.

Line 41-42: Delete “of vertical velocity”.

Line 48: Add “s” to the word “field”.

Page 3:

Line 75: Delete “real”.

Lines 89-91: This sentence is quite difficult to understand. I suggest that it be described simply and clearly.

Line 92: Delete “to assimilate  $w$  observation directly”.

Line 96: Add “s” to the word “adjust”.

Page 14:

Line 279: Change “wish” to “wishes”.
